# Supplementary material for: Von der Regierungslehre zur Demokratieforschung: Perspektiven für die didaktische Transformation von neueren Fachkonzepten der politischen Bildung
Source: MDPI journal article supplement (doi:10.3390/toxins15030185), 2012-01-01
Supplement: s1 [file s1]

# Supplementary Materials: Zearalenone and Its Emerging Metabolites Promptly Affect the Rumen Microbiota in Holstein Cows Fed a Forage-Rich Diet

Thomas Hartinger, Iris Kröger, Viktoria Neubauer, Johannes Faas, Barbara Doupovec, Dian Schatzmayr and Qendrim Zebeli

**Table S1.** Chemical composition and ZEN levels of diet components fed to Holstein cows (in % of dry matter unless not stated otherwise,  $\pm$  standard deviation; Gruber-Dorninger et al., [7]).

| Item                                   | Grass silage hay mix (50:50) | Concentrate     |
|----------------------------------------|------------------------------|-----------------|
| Dry matter (g/kg fresh matter)         | 54.6 $\pm$ 1.08              | 89.6 $\pm$ 0.18 |
| Crude protein                          | 13.2 $\pm$ 0.37              | 11.0 $\pm$ 0.55 |
| Ether extract                          | 1.70 $\pm$ 0.16              | 2.76 $\pm$ 0.09 |
| Ash                                    | 7.49 $\pm$ 0.41              | 7.98 $\pm$ 0.28 |
| aNDFom <sup>1</sup>                    | 57.5 $\pm$ 1.06              | 13.7 $\pm$ 0.34 |
| ADFom <sup>2</sup>                     | 37.4 $\pm$ 0.62              | 4.39 $\pm$ 0.24 |
| Zearalenone <sup>3</sup> ( $\mu$ g/kg) | <LOQ                         | 104             |

<sup>1</sup>Neutral detergent fiber assayed with a heat stable  $\alpha$ -amylase and expressed exclusive of residual ash. <sup>2</sup>Acid detergent fiber expressed exclusive of residual ash. <sup>3</sup>The analyzed zearalenone concentration was 10.7 mg/kg for the ZEN-contaminated concentrate; LOQ, level of quantification.
