# Supplementary material for: Zearalenone and Its Emerging Metabolites Promptly Affect the Rumen Microbiota in Holstein Cows Fed a Forage-Rich Diet
Source: Toxins (Basel). 2023 Feb 28;15(3):185. doi: 10.3390/toxins15030185 (PMC10053043; doi:10.3390/toxins15030185)
Supplement: Supplementary file 1 [file toxins-15-00185-s001.zip › Supplementary_Table_S2.xlsx]

## Sheet: Phylum
Kingdom	Phylum	%
Bacteria	Firmicutes	67.93
Bacteria	Bacteroidetes	17.2431
Bacteria	Patescibacteria	5.04009
Bacteria	Tenericutes	1.4321
Bacteria	Fibrobacteres	1.33686
Bacteria	Actinobacteria	1.22791
Bacteria	Proteobacteria	1.11708
Bacteria	Lentisphaerae	1.01224
Bacteria	Synergistetes	0.885296
Bacteria	Cyanobacteria	0.804766
Bacteria	Kiritimatiellaeota	0.748301
Bacteria	Chloroflexi	0.37442
Bacteria	Elusimicrobia	0.255119
Bacteria	Planctomycetes	0.249287
Bacteria	Verrucomicrobia	0.135132
Bacteria	WPS-2	0.127976
Bacteria	Armatimonadetes	0.0641597
Bacteria	Epsilonbacteraeota	0.0160767

## Sheet: Genus
Kingdom	Phylum	Class	Order	Family	Genus	%
Bacteria	Firmicutes	Clostridia	Clostridiales	Christensenellaceae	Christensenellaceae R-7 group	6.18806
Bacteria	Firmicutes	Clostridia	Clostridiales	Ruminococcaceae	Ruminococcaceae NK4A214 group	5.4647
Bacteria	Bacteroidetes	Bacteroidia	Bacteroidales	Prevotellaceae	Prevotella 1	5.37481
Bacteria	Bacteroidetes	Bacteroidia	Bacteroidales	Rikenellaceae	Rikenellaceae RC9 gut group	4.96103
Bacteria	Firmicutes	Clostridia	Clostridiales	Ruminococcaceae	Ruminococcus 1	4.91555
Bacteria	Firmicutes	Clostridia	Clostridiales	Ruminococcaceae	uncultured	3.72219
Bacteria	Firmicutes	Clostridia	Clostridiales	Ruminococcaceae	Ruminococcaceae UCG-014	3.32091
Bacteria	Firmicutes	Clostridia	Clostridiales	Ruminococcaceae	Saccharofermentans	3.14716
Bacteria	Firmicutes	Clostridia	Clostridiales	Lachnospiraceae	Lachnospiraceae NK3A20 group	2.72196
Bacteria	Patescibacteria	Saccharimonadia	Saccharimonadales	Saccharimonadaceae	Candidatus Saccharimonas	2.60884
Bacteria	Firmicutes	Clostridia	Clostridiales	Ruminococcaceae	Ruminococcaceae UCG-010	2.29867
Bacteria	Patescibacteria	Gracilibacteria	Absconditabacteriales (SR1)	uncultured rumen bacterium	uncultured rumen bacterium	2.12384
Bacteria	Firmicutes	Clostridia	Clostridiales	Ruminococcaceae	Ruminococcaceae UCG-011	2.11002
Bacteria	Firmicutes	Clostridia	Clostridiales	Lachnospiraceae	Lachnospiraceae AC2044 group	2.04301
Bacteria	Firmicutes	Clostridia	Clostridiales	Ruminococcaceae	[Eubacterium] coprostanoligenes group	1.76368
Bacteria	Firmicutes	Clostridia	Clostridiales	Lachnospiraceae	Acetitomaculum	1.71981
Bacteria	Firmicutes	Clostridia	Clostridiales	Lachnospiraceae	Lachnospiraceae XPB1014 group	1.66825
Bacteria	Tenericutes	Mollicutes	Anaeroplasmatales	Anaeroplasmataceae	Anaeroplasma	1.40107
Bacteria	Firmicutes	Clostridia	Clostridiales	Lachnospiraceae	[Eubacterium] ruminantium group	1.3772
Bacteria	Fibrobacteres	Fibrobacteria	Fibrobacterales	Fibrobacteraceae	Fibrobacter	1.31716
Bacteria	Bacteroidetes	Bacteroidia	Bacteroidales	F082	uncultured rumen bacterium	1.26712
Bacteria	Firmicutes	Clostridia	Clostridiales	Lachnospiraceae	Butyrivibrio 2	1.23462
Bacteria	Firmicutes	Clostridia	Clostridiales	Ruminococcaceae	Ruminococcus 2	1.22011
Bacteria	Firmicutes	Clostridia	Clostridiales	Lachnospiraceae	uncultured	1.20462
Bacteria	Firmicutes	Clostridia	Clostridiales	Lachnospiraceae	Pseudobutyrivibrio	1.11115
Bacteria	Firmicutes	Clostridia	Clostridiales	Family XIII	Family XIII AD3011 group	1.10895
Bacteria	Firmicutes	Clostridia	Clostridiales	Lachnospiraceae	[Eubacterium] hallii group	1.02709
Bacteria	Firmicutes	Clostridia	Clostridiales	Lachnospiraceae	[Bacteroides] pectinophilus group	1.02553
Bacteria	Bacteroidetes	Bacteroidia	Bacteroidales	Prevotellaceae	Prevotellaceae UCG-003	0.965631
Bacteria	Firmicutes	Clostridia	Clostridiales	Lachnospiraceae	Lachnospiraceae NK4A136 group	0.929654
Bacteria	Firmicutes	Clostridia	Clostridiales	Lachnospiraceae	Blautia	0.81746
Bacteria	Bacteroidetes	Bacteroidia	Bacteroidales	Prevotellaceae	Prevotellaceae UCG-001	0.81452
Bacteria	Firmicutes	Clostridia	Clostridiales	Ruminococcaceae	Papillibacter	0.808442
Bacteria	Firmicutes	Clostridia	Clostridiales	Ruminococcaceae	Ruminococcaceae UCG-005	0.710609
Bacteria	Spirochaetes	Spirochaetia	Spirochaetales	Spirochaetaceae	Treponema 2	0.704286
Bacteria	Kiritimatiellaeota	Kiritimatiellae	WCHB1-41	uncultured rumen bacterium	uncultured rumen bacterium	0.69566
Bacteria	Firmicutes	Clostridia	Clostridiales	Family XIII	Anaerovorax	0.693258
Bacteria	Firmicutes	Clostridia	Clostridiales	Lachnospiraceae	Lachnospiraceae ND3007 group	0.639441
Bacteria	Firmicutes	Clostridia	Clostridiales	Lachnospiraceae	probable genus 10	0.638656
Bacteria	Bacteroidetes	Bacteroidia	Bacteroidales	Muribaculaceae	uncultured rumen bacterium	0.614786
Bacteria	Cyanobacteria	Melainabacteria	Gastranaerophilales	uncultured rumen bacterium	uncultured rumen bacterium	0.562047
Bacteria	Firmicutes	Clostridia	Clostridiales	Lachnospiraceae	Marvinbryantia	0.554254
Bacteria	Firmicutes	Clostridia	Clostridiales	Lachnospiraceae	Lachnospiraceae UCG-008	0.544353
Bacteria	Bacteroidetes	Bacteroidia	Bacteroidales	Bacteroidales BS11 gut group	uncultured rumen bacterium	0.533227
Bacteria	Firmicutes	Clostridia	Clostridiales	Lachnospiraceae	[Eubacterium] ventriosum group	0.523473
Bacteria	Firmicutes	Clostridia	Clostridiales	Lachnospiraceae	Oribacterium	0.519944
Bacteria	Firmicutes	Clostridia	Clostridiales	Lachnospiraceae	Lachnoclostridium 10	0.507935
Bacteria	Firmicutes	Negativicutes	Selenomonadales	Acidaminococcaceae	Succiniclasticum	0.467743
Bacteria	Actinobacteria	Coriobacteriia	Coriobacteriales	Atopobiaceae	Olsenella	0.442648
Bacteria	Actinobacteria	Coriobacteriia	Coriobacteriales	Eggerthellaceae	DNF00809	0.437747
Bacteria	Firmicutes	Clostridia	Clostridiales	Lachnospiraceae	Lachnospiraceae FCS020 group	0.415739
Bacteria	Bacteroidetes	Bacteroidia	Bacteroidales	F082	uncultured bacterium	0.412161
Bacteria	Firmicutes	Clostridia	Clostridiales	Ruminococcaceae	CAG-352	0.410201
Bacteria	Firmicutes	Clostridia	Clostridiales	Family XIII	[Eubacterium] nodatum group	0.389125
Bacteria	Bacteroidetes	Bacteroidia	Bacteroidales	p-251-o5	uncultured rumen bacterium	0.385546
Bacteria	Chloroflexi	Anaerolineae	Anaerolineales	Anaerolineaceae	Flexilinea	0.37442
Bacteria	Firmicutes	Clostridia	Clostridiales	Ruminococcaceae	Ruminococcaceae V9D2013 group	0.37197
Bacteria	Bacteroidetes	Bacteroidia	Bacteroidales	Bacteroidales RF16 group	uncultured rumen bacterium	0.367754
Bacteria	Lentisphaerae	Oligosphaeria	Oligosphaerales	Oligosphaeraceae	horsej-a03	0.361971
Bacteria	Firmicutes	Clostridia	Clostridiales	Lachnospiraceae	Lachnospiraceae UCG-006	0.334032
Bacteria	Firmicutes	Clostridia	Clostridiales	Clostridiales vadinBB60 group	uncultured bacterium	0.328298
Bacteria	Firmicutes	Clostridia	Clostridiales	Lachnospiraceae	[Ruminococcus] gauvreauii group	0.292615
Bacteria	Firmicutes	Clostridia	Clostridiales	Defluviitaleaceae	Defluviitaleaceae UCG-011	0.274627
Bacteria	Firmicutes	Clostridia	Clostridiales	Lachnospiraceae	Syntrophococcus	0.248895
Bacteria	Firmicutes	Clostridia	Clostridiales	Lachnospiraceae	Roseburia	0.246101
Bacteria	Firmicutes	Clostridia	Clostridiales	Ruminococcaceae	Ruminiclostridium 1	0.245513
Bacteria	Firmicutes	Clostridia	Clostridiales	Lachnospiraceae	Tyzzerella 3	0.244532
Bacteria	Firmicutes	Clostridia	Clostridiales	Ruminococcaceae	Ruminiclostridium 9	0.235955
Bacteria	Lentisphaerae	Lentisphaeria	Victivallales	vadinBE97	uncultured bacterium	0.232475
Bacteria	Firmicutes	Clostridia	Clostridiales	Ruminococcaceae	Ruminiclostridium 6	0.225515
Bacteria	Firmicutes	Clostridia	Clostridiales	Ruminococcaceae	Ruminococcaceae UCG-002	0.220711
Bacteria	Proteobacteria	Gammaproteobacteria	Aeromonadales	Succinivibrionaceae	Ruminobacter	0.214683
Bacteria	Firmicutes	Clostridia	Clostridiales	Lachnospiraceae	Lachnoclostridium 1	0.213163
Bacteria	Firmicutes	Clostridia	Clostridiales	Ruminococcaceae	Ruminococcaceae UCG-001	0.212428
Bacteria	Firmicutes	Clostridia	Clostridiales	Christensenellaceae	uncultured	0.209634
Bacteria	Proteobacteria	Alphaproteobacteria	Rhodospirillales	uncultured	gut metagenome	0.202821
Bacteria	Firmicutes	Clostridia	Clostridiales	Lachnospiraceae	Shuttleworthia	0.202135
Bacteria	Firmicutes	Clostridia	Clostridiales	Lachnospiraceae	Lachnospiraceae UCG-002	0.194244
Bacteria	Firmicutes	Clostridia	Clostridiales	Lachnospiraceae	Lachnospiraceae FE2018 group	0.192038
Bacteria	Patescibacteria	Gracilibacteria	Absconditabacteriales (SR1)	uncultured prokaryote	uncultured prokaryote	0.18944
Bacteria	Firmicutes	Clostridia	Clostridiales	Lachnospiraceae	[Eubacterium] xylanophilum group	0.184735
Bacteria	Lentisphaerae	Lentisphaeria	Victivallales	vadinBE97	uncultured rumen bacterium	0.177285
Bacteria	Cyanobacteria	Melainabacteria	Gastranaerophilales	uncultured bacterium	uncultured bacterium	0.176844
Bacteria	Elusimicrobia	Endomicrobia	Endomicrobiales	Endomicrobiaceae	Candidatus Endomicrobium	0.172285
Bacteria	Firmicutes	Clostridia	Clostridiales	Ruminococcaceae	Ruminococcaceae UCG-004	0.171844
Bacteria	Firmicutes	Clostridia	Clostridiales	Ruminococcaceae	Ruminococcaceae UCG-013	0.170766
Bacteria	Firmicutes	Clostridia	Clostridiales	Lachnospiraceae	Anaerosporobacter	0.164296
Bacteria	Bacteroidetes	Bacteroidia	Bacteroidales	Prevotellaceae	Prevotellaceae NK3B31 group	0.163904
Bacteria	Firmicutes	Negativicutes	Selenomonadales	Veillonellaceae	Veillonellaceae UCG-001	0.16013
Bacteria	Lentisphaerae	Lentisphaeria	Victivallales	Victivallaceae	uncultured rumen bacterium	0.157875
Bacteria	Bacteroidetes	Bacteroidia	Bacteroidales	p-251-o5	uncultured bacterium	0.156552
Bacteria	Firmicutes	Clostridia	Clostridiales	Lachnospiraceae	Coprococcus 1	0.150278
Bacteria	Bacteroidetes	Bacteroidia	Bacteroidales	Bacteroidales UCG-001	uncultured rumen bacterium	0.145916
Bacteria	Bacteroidetes	Bacteroidia	Bacteroidales	Bacteroidales RF16 group	uncultured bacterium	0.142534
Bacteria	Firmicutes	Clostridia	Clostridiales	Lachnospiraceae	FD2005	0.134838
Bacteria	Firmicutes	Clostridia	Clostridiales	Lachnospiraceae	Moryella	0.131407
Bacteria	Actinobacteria	Coriobacteriia	Coriobacteriales	Atopobiaceae	Atopobium	0.129104
Bacteria	Firmicutes	Clostridia	Clostridiales	Family XIII	Family XIII UCG-001	0.127633
Bacteria	Bacteroidetes	Bacteroidia	Bacteroidales	uncultured	uncultured rumen bacterium	0.122095
Bacteria	Firmicutes	Clostridia	Clostridiales	Lachnospiraceae	Lachnospiraceae UCG-009	0.113223
Bacteria	Firmicutes	Erysipelotrichia	Erysipelotrichales	Erysipelotrichaceae	Erysipelotrichaceae UCG-004	0.106361
Bacteria	Planctomycetes	Planctomycetacia	Pirellulales	Pirellulaceae	p-1088-a5 gut group	0.104498
Bacteria	Firmicutes	Clostridia	Clostridiales	Family XIII	[Eubacterium] brachy group	0.100969
Bacteria	Bacteroidetes	Bacteroidia	Bacteroidales	Prevotellaceae	Prevotellaceae UCG-004	0.100185
Bacteria	Firmicutes	Clostridia	Clostridiales	Lachnospiraceae	possible genus Sk018	0.0978816
Bacteria	Proteobacteria	Alphaproteobacteria	Rickettsiales	uncultured	uncultured rumen bacterium	0.0976855
Bacteria	Firmicutes	Clostridia	Clostridiales	Lachnospiraceae	Eubacterium uniforme	0.0973424
Bacteria	Patescibacteria	Gracilibacteria	Absconditabacteriales (SR1)	uncultured bacterium	uncultured bacterium	0.0940584
Bacteria	Firmicutes	Clostridia	Clostridiales	Clostridiales vadinBB60 group	uncultured rumen bacterium	0.0870004
Bacteria	Bacteroidetes	Bacteroidia	Bacteroidales	Bacteroidales RF16 group	unidentified rumen bacterium RFN46	0.0846967
Bacteria	Verrucomicrobia	Verrucomicrobiae	LD1-PB3	uncultured rumen bacterium	uncultured rumen bacterium	0.0830302
Bacteria	Synergistetes	Synergistia	Synergistales	Synergistaceae	Pyramidobacter	0.0820009
Bacteria	Elusimicrobia	Elusimicrobia	Elusimicrobiales	Elusimicrobiaceae	Elusimicrobium	0.0816578
Bacteria	Lentisphaerae	Oligosphaeria	Oligosphaerales	Oligosphaeraceae	Z20	0.0807265
Bacteria	Actinobacteria	Coriobacteriia	Coriobacteriales	Eggerthellaceae	uncultured	0.0780308
Bacteria	WPS-2	Burkholderiales bacterium Beta_02	Burkholderiales bacterium Beta_02	Burkholderiales bacterium Beta_02	Burkholderiales bacterium Beta_02	0.0776877
Bacteria	Firmicutes	Erysipelotrichia	Erysipelotrichales	Erysipelotrichaceae	Erysipelotrichaceae UCG-009	0.0769524
Bacteria	Firmicutes	Clostridia	Clostridiales	Lachnospiraceae	Lachnospira	0.0751389
Bacteria	Firmicutes	Clostridia	Clostridiales	Family XIII	Mogibacterium	0.0738645
Bacteria	Bacteroidetes	Bacteroidia	Bacteroidales	Bacteroidetes BD2-2	uncultured rumen bacterium	0.0736685
Bacteria	Firmicutes	Clostridia	Clostridiales	Lachnospiraceae	Coprococcus 2	0.0734234
Bacteria	Firmicutes	Clostridia	Clostridiales	Family XIII	uncultured	0.0721
Bacteria	Proteobacteria	Alphaproteobacteria	Rhodospirillales	uncultured	uncultured rumen bacterium	0.0706786
Bacteria	Proteobacteria	Gammaproteobacteria	Aeromonadales	Succinivibrionaceae	Succinivibrio	0.0699434
Bacteria	Firmicutes	Clostridia	Clostridiales	Lachnospiraceae	Lachnoclostridium 12	0.0688651
Bacteria	Armatimonadetes	uncultured	uncultured bacterium	uncultured bacterium	uncultured bacterium	0.0641597
Bacteria	Firmicutes	Clostridia	Clostridiales	Ruminococcaceae	Ruminiclostridium	0.0640127
Bacteria	Bacteroidetes	Bacteroidia	Bacteroidales	PeH15	uncultured rumen bacterium	0.0625422
Bacteria	Bacteroidetes	Bacteroidia	Bacteroidales	Prevotellaceae	Prevotellaceae Ga6A1 group	0.0620521
Bacteria	Synergistetes	Synergistia	Synergistales	Synergistaceae	Fretibacterium	0.0568566
Bacteria	Bacteroidetes	Bacteroidia	Bacteroidales	Bacteroidales BS11 gut group	uncultured bacterium	0.0552391
Bacteria	Firmicutes	Bacilli	Lactobacillales	Streptococcaceae	Streptococcus	0.0547
Bacteria	Proteobacteria	Deltaproteobacteria	Desulfovibrionales	Desulfovibrionaceae	Desulfovibrio	0.0534256
Bacteria	Planctomycetes	Pla4 lineage	uncultured rumen bacterium	uncultured rumen bacterium	uncultured rumen bacterium	0.0530335
Bacteria	WPS-2	uncultured rumen bacterium	uncultured rumen bacterium	uncultured rumen bacterium	uncultured rumen bacterium	0.0502887
Bacteria	Bacteroidetes	Bacteroidia	Bacteroidales	F082	Bacteroidales bacterium Bact_22	0.0501416
Bacteria	Bacteroidetes	Bacteroidia	Bacteroidales	Marinifilaceae	uncultured	0.0499456
Bacteria	Bacteroidetes	Bacteroidia	Bacteroidales	Marinilabiliaceae	uncultured	0.0491123
Bacteria	Proteobacteria	Alphaproteobacteria	Sphingomonadales	Sphingomonadaceae	Sphingomonas	0.0482791
Bacteria	Kiritimatiellaeota	Kiritimatiellae	WCHB1-41	uncultured bacterium	uncultured bacterium	0.048132
Bacteria	Firmicutes	Clostridia	Clostridiales	Family XIII	[Eubacterium] saphenum group	0.0465636
Bacteria	Firmicutes	Erysipelotrichia	Erysipelotrichales	Erysipelotrichaceae	Solobacterium	0.0465146
Bacteria	Firmicutes	Clostridia	Clostridiales	Ruminococcaceae	Candidatus Soleaferrea	0.0465146
Bacteria	Bacteroidetes	Bacteroidia	Bacteroidales	Rikenellaceae	U29-B03	0.0464656
Bacteria	Verrucomicrobia	Verrucomicrobiae	Pedosphaerales	Pedosphaeraceae	uncultured rumen bacterium	0.0463185
Bacteria	Proteobacteria	Gammaproteobacteria	Aeromonadales	Succinivibrionaceae	Succinivibrionaceae UCG-002	0.0457303
Bacteria	Planctomycetes	Planctomycetacia	Pirellulales	Pirellulaceae	CPla-4 termite group	0.0451422
Bacteria	Actinobacteria	Coriobacteriia	Coriobacteriales	Eggerthellaceae	Enterorhabdus	0.0443579
Bacteria	Firmicutes	Negativicutes	Selenomonadales	Veillonellaceae	Selenomonas 1	0.0435737
Bacteria	Firmicutes	Clostridia	Clostridiales	Lachnospiraceae	Lachnospiraceae NC2004 group	0.0428875
Bacteria	Firmicutes	Clostridia	Clostridiales	Lachnospiraceae	Howardella	0.0425444
Bacteria	Firmicutes	Clostridia	Clostridiales	Clostridiales vadinBB60 group	uncultured rumen bacterium 4C28d-15	0.0409269
Bacteria	Planctomycetes	Planctomycetacia	Pirellulales	Pirellulaceae	Pirellula	0.0399957
Bacteria	Firmicutes	Clostridia	Clostridiales	Eubacteriaceae	Anaerofustis	0.0394565
Bacteria	Proteobacteria	Gammaproteobacteria	Aeromonadales	Succinivibrionaceae	Succinimonas	0.0393585
Bacteria	Actinobacteria	Coriobacteriia	Coriobacteriales	Coriobacteriales Incertae Sedis	Raoultibacter	0.0374959
Bacteria	Firmicutes	Clostridia	Clostridiales	Lachnospiraceae	[Eubacterium] cellulosolvens group	0.0368588
Bacteria	Proteobacteria	Alphaproteobacteria	Rhizobiales	Rhizobiaceae	Allorhizobium-Neorhizobium-Pararhizobium-Rhizobium	0.0351923
Bacteria	Proteobacteria	Gammaproteobacteria	Betaproteobacteriales	Burkholderiaceae	Sutterella	0.0347511
Bacteria	Firmicutes	Clostridia	Clostridiales	Ruminococcaceae	Ruminococcaceae UCG-012	0.0337218
Bacteria	Firmicutes	Clostridia	Clostridiales	Lachnospiraceae	Lachnospiraceae NK4B4 group	0.0311241
Bacteria	Proteobacteria	Alphaproteobacteria	Paracaedibacterales	Paracaedibacteraceae	uncultured	0.0297517
Bacteria	Cyanobacteria	Melainabacteria	Gastranaerophilales	uncultured organism	uncultured organism	0.0296046
Bacteria	Firmicutes	Clostridia	Clostridiales	Lachnospiraceae	Lachnospiraceae UCG-010	0.0289675
Bacteria	Bacteroidetes	Bacteroidia	Bacteroidales	Prevotellaceae	uncultured	0.0286244
Bacteria	Firmicutes	Clostridia	Clostridiales	Lachnospiraceae	possible genus Sk003-Sk004	0.0277421
Bacteria	Bacteroidetes	Bacteroidia	Bacteroidales	Muribaculaceae	uncultured bacterium	0.0267128
Bacteria	Firmicutes	Clostridia	Clostridiales	Ruminococcaceae	Ruminococcaceae UCG-007	0.0264677
Bacteria	Firmicutes	Erysipelotrichia	Erysipelotrichales	Erysipelotrichaceae	uncultured	0.0262226
Bacteria	Bacteroidetes	Bacteroidia	Bacteroidales	p-251-o5	uncultured Bacteroidales bacterium	0.0247032
Bacteria	Firmicutes	Clostridia	Clostridiales	Peptococcaceae	uncultured	0.0247032
Bacteria	Cyanobacteria	Melainabacteria	Gastranaerophilales	rumen bacterium YS2	rumen bacterium YS2	0.0232328
Bacteria	Proteobacteria	Deltaproteobacteria	Oligoflexales	0319-6G20	uncultured rumen bacterium	0.0232328
Bacteria	Proteobacteria	Deltaproteobacteria	SAR324 clade(Marine group B)	uncultured bacterium	uncultured bacterium	0.0230857
Bacteria	Firmicutes	Clostridia	Clostridiales	Lachnospiraceae	Lachnoclostridium	0.0224976
Bacteria	Firmicutes	Clostridia	Clostridiales	Ruminococcaceae	Ruminiclostridium 5	0.0218604
Bacteria	Actinobacteria	Coriobacteriia	Coriobacteriales	Atopobiaceae	uncultured	0.0216643
Bacteria	Bacteroidetes	Bacteroidia	Bacteroidales	Rikenellaceae	SP3-e08	0.0209781
Bacteria	Fibrobacteres	Fibrobacteria	Fibrobacterales	Fibrobacteraceae	uncultured	0.0197037
Bacteria	Spirochaetes	MVP-15	uncultured rumen bacterium	uncultured rumen bacterium	uncultured rumen bacterium	0.0193116
Bacteria	Firmicutes	Clostridia	Clostridiales	Ruminococcaceae	Ruminococcaceae UCG-009	0.0188705
Bacteria	Bacteroidetes	Bacteroidia	Bacteroidales	Paludibacteraceae	uncultured	0.0186254
Bacteria	Firmicutes	Erysipelotrichia	Erysipelotrichales	Erysipelotrichaceae	[Anaerorhabdus] furcosa group	0.0185764
Bacteria	Proteobacteria	Alphaproteobacteria	Rhodospirillales	uncultured	uncultured bacterium	0.0182823
Bacteria	Tenericutes	Mollicutes	Izimaplasmatales	uncultured bacterium	uncultured bacterium	0.0182333
Bacteria	Firmicutes	Erysipelotrichia	Erysipelotrichales	Erysipelotrichaceae	Erysipelotrichaceae UCG-008	0.0177432
Bacteria	Patescibacteria	Gracilibacteria	Absconditabacteriales (SR1)	SR1 bacterium canine oral taxon 369	SR1 bacterium canine oral taxon 369	0.0176942
Bacteria	Proteobacteria	Alphaproteobacteria	Rhizobiales	Beijerinckiaceae	Methylobacterium	0.0174981
Bacteria	Bacteroidetes	Bacteroidia	Bacteroidales	CAP-aah99b04	uncultured bacterium	0.017204
Bacteria	Firmicutes	Clostridia	Clostridiales	Ruminococcaceae	Oscillospira	0.0162727
Bacteria	Proteobacteria	Deltaproteobacteria	Bradymonadales	uncultured rumen bacterium	uncultured rumen bacterium	0.0161257
Bacteria	Epsilonbacteraeota	Campylobacteria	Campylobacterales	Campylobacteraceae	Campylobacter	0.0160767
Bacteria	Firmicutes	Bacilli	Lactobacillales	Lactobacillaceae	Lactobacillus	0.0159787
Bacteria	Firmicutes	Bacilli	Lactobacillales	Leuconostocaceae	Weissella	0.0154885
Bacteria	Firmicutes	Negativicutes	Selenomonadales	Veillonellaceae	Quinella	0.0152925
Bacteria	Firmicutes	Bacilli	Lactobacillales	Lactobacillaceae	Pediococcus	0.0146063
Bacteria	Firmicutes	Clostridia	Clostridiales	Lachnospiraceae	Lachnospiraceae UCG-001	0.0143122
Bacteria	Proteobacteria	Alphaproteobacteria	Rickettsiales	uncultured	uncultured alpha proteobacterium	0.013724
Bacteria	Firmicutes	Negativicutes	Selenomonadales	Veillonellaceae	uncultured	0.013675
Bacteria	Firmicutes	Clostridia	Clostridiales	Lachnospiraceae	Anaerostipes	0.0134789
Bacteria	Firmicutes	Clostridia	Clostridiales	Lachnospiraceae	Tyzzerella	0.0133809
Bacteria	Firmicutes	Clostridia	Clostridiales	Lachnospiraceae	GCA-900066575	0.0128417
Bacteria	Cyanobacteria	Melainabacteria	Gastranaerophilales	uncultured rumen bacterium 4C0d-2	uncultured rumen bacterium 4C0d-2	0.0121555
Bacteria	Firmicutes	Negativicutes	Selenomonadales	Veillonellaceae	Schwartzia	0.0120575
Bacteria	Proteobacteria	Gammaproteobacteria	Aeromonadales	Succinivibrionaceae	Anaerobiospirillum	0.0112733
Bacteria	Proteobacteria	Deltaproteobacteria	Desulfovibrionales	Desulfovibrionaceae	Mailhella	0.0111753
Bacteria	Spirochaetes	Spirochaetia	Spirochaetales	Spirochaetaceae	Sediminispirochaeta	0.0109792
Bacteria	Firmicutes	Clostridia	Clostridiales	Lachnospiraceae	[Eubacterium] oxidoreducens group	0.0104891
Bacteria	Bacteroidetes	Bacteroidia	Bacteroidales	M2PB4-65 termite group	uncultured Bacteroidetes bacterium	0.00970483
Bacteria	Firmicutes	Clostridia	Clostridiales	Ruminococcaceae	Oscillibacter	0.00828342
Bacteria	Firmicutes	Clostridia	Clostridiales	Ruminococcaceae	Hydrogenoanaerobacterium	0.00730313
Bacteria	Firmicutes	Clostridia	Clostridiales	Ruminococcaceae	uncultured rumen bacterium	0.00715609
Bacteria	Firmicutes	Clostridia	Clostridiales	Lachnospiraceae	Butyrivibrio	0.00696003
Bacteria	Actinobacteria	Actinobacteria	Actinomycetales	Actinomycetaceae	uncultured	0.00681299
Bacteria	Actinobacteria	Coriobacteriia	Coriobacteriales	Eggerthellaceae	Slackia	0.00671496
Bacteria	Planctomycetes	Planctomycetacia	Pirellulales	Pirellulaceae	Termite planctomycete cluster	0.00661693
Bacteria	Bacteroidetes	Bacteroidia	Bacteroidales	Prevotellaceae	Alloprevotella	0.00637186
Bacteria	Firmicutes	Clostridia	Clostridiales	Lachnospiraceae	Lachnospiraceae UCG-004	0.00612679
Bacteria	Proteobacteria	Alphaproteobacteria	Rhodospirillales	uncultured	Alphaproteobacteria bacterium canine oral taxon 081	0.00612679
Bacteria	Bacteroidetes	Bacteroidia	Bacteroidales	COB P4-1 termite group	uncultured rumen bacterium	0.00607777
Bacteria	Firmicutes	Clostridia	Clostridiales	Lachnospiraceae	Agathobacter	0.00607777
Bacteria	Bacteroidetes	Bacteroidia	Bacteroidales	Prevotellaceae	Prevotellaceae YAB2003 group	0.00602876
Bacteria	Spirochaetes	Spirochaetia	Spirochaetales	Spirochaetaceae	Sphaerochaeta	0.0054896
Bacteria	Bacteroidetes	Bacteroidia	Bacteroidales	Prevotellaceae	uncultured bacterium	0.00519552
Bacteria	Proteobacteria	Alphaproteobacteria	Rickettsiales	uncultured	uncultured bacterium	0.00504847
Bacteria	Firmicutes	Clostridia	Clostridiales	Ruminococcaceae	Intestinimonas	0.00485242
Bacteria	Proteobacteria	Alphaproteobacteria	Rhizobiales	Rhizobiaceae	Aureimonas	0.0048034
Bacteria	Firmicutes	Erysipelotrichia	Erysipelotrichales	Erysipelotrichaceae	Erysipelotrichaceae UCG-006	0.00470537
Bacteria	Proteobacteria	Deltaproteobacteria	PB19	uncultured bacterium	uncultured bacterium	0.00436227
Bacteria	Bacteroidetes	Bacteroidia	Bacteroidales	Rikenellaceae	hoa5-07d05 gut group	0.00431326
Bacteria	Tenericutes	Mollicutes	Mollicutes RF39	uncultured bacterium	uncultured bacterium	0.00406819
Bacteria	Proteobacteria	Alphaproteobacteria	Acetobacterales	Acetobacteraceae	Acetobacter	0.00401917
Bacteria	Firmicutes	Clostridia	Clostridiales	Lachnospiraceae	XBB1006	0.00392114
Bacteria	Proteobacteria	Alphaproteobacteria	Caulobacterales	Caulobacteraceae	Brevundimonas	0.0037741
Bacteria	Actinobacteria	Coriobacteriia	Coriobacteriales	uncultured	uncultured bacterium	0.00367607
Bacteria	Actinobacteria	Actinobacteria	Micrococcales	Microbacteriaceae	Curtobacterium	0.00357804
Bacteria	Actinobacteria	Actinobacteria	Corynebacteriales	Corynebacteriaceae	Corynebacterium 1	0.00348002
Bacteria	Spirochaetes	Spirochaetia	Spirochaetales	Spirochaetaceae	M2PT2-76 termite group	0.00328396
Bacteria	Bacteroidetes	Bacteroidia	Bacteroidales	F082	bacterium P201	0.00323494
Bacteria	Kiritimatiellaeota	Kiritimatiellae	WCHB1-41	Verrucomicrobia bacterium ADurb.Bin070	Verrucomicrobia bacterium ADurb.Bin070	0.00313692
Bacteria	Verrucomicrobia	Verrucomicrobiae	LD1-PB3	uncultured bacterium	uncultured bacterium	0.0030879
Bacteria	Synergistetes	Synergistia	Synergistales	Synergistaceae	Synergistes	0.0030879
Bacteria	Bacteroidetes	Ignavibacteria	OPB56	uncultured rumen bacterium	uncultured rumen bacterium	0.00269579
Bacteria	Proteobacteria	Deltaproteobacteria	Desulfuromonadales	Desulfuromonadaceae	Desulfuromonas	0.00259776
Bacteria	Patescibacteria	Microgenomatia	Candidatus Pacebacteria	uncultured bacterium	uncultured bacterium	0.0024017
Bacteria	Actinobacteria	Actinobacteria	Frankiales	Geodermatophilaceae	Geodermatophilus	0.0024017
Bacteria	Tenericutes	Mollicutes	Izimaplasmatales	Izimaplasmataceae	unidentified rumen bacterium RF3	0.0024017
Bacteria	Tenericutes	Mollicutes	NED5E9	uncultured rumen bacterium	uncultured rumen bacterium	0.00230367
Bacteria	Proteobacteria	Alphaproteobacteria	Rhizobiales	Devosiaceae	Devosia	0.00220564
Bacteria	Proteobacteria	Deltaproteobacteria	SAR324 clade(Marine group B)	uncultured organism	uncultured organism	0.00220564
Bacteria	Actinobacteria	Coriobacteriia	Coriobacteriales	Coriobacteriales Incertae Sedis	uncultured	0.00215663
Bacteria	Firmicutes	Negativicutes	Selenomonadales	Veillonellaceae	Anaerovibrio	0.00210761
Bacteria	Tenericutes	Mollicutes	EMP-G18	uncultured Mollicutes bacterium	uncultured Mollicutes bacterium	0.00210761
Bacteria	Verrucomicrobia	Verrucomicrobiae	Opitutales	Puniceicoccaceae	uncultured	0.00196057
Bacteria	Patescibacteria	Gracilibacteria	JGI 0000069-P22	uncultured rumen bacterium	uncultured rumen bacterium	0.00191156
Bacteria	Lentisphaerae	Lentisphaeria	Victivallales	Victivallaceae	uncultured bacterium	0.00191156
Bacteria	Actinobacteria	Actinobacteria	Corynebacteriales	Nocardiaceae	Rhodococcus	0.00181353
Bacteria	Firmicutes	Clostridia	Clostridiales	Clostridiales vadinBB60 group	uncultured prokaryote	0.00161747
Bacteria	Firmicutes	Clostridia	Clostridiales	Lachnospiraceae	Lachnobacterium	0.00161747
Bacteria	Proteobacteria	Alphaproteobacteria	Rhizobiales	Xanthobacteraceae	Bradyrhizobium	0.00151944
Bacteria	Firmicutes	Clostridia	Clostridiales	Eubacteriaceae	Eubacterium	0.00142141
Bacteria	Kiritimatiellaeota	Kiritimatiellae	WCHB1-41	unidentified rumen bacterium RFP12	unidentified rumen bacterium RFP12	0.0013724
Bacteria	Actinobacteria	Actinobacteria	Micrococcales	Microbacteriaceae	Clavibacter	0.00127437
Bacteria	Elusimicrobia	Rs-M47	uncultured rumen bacterium	uncultured rumen bacterium	uncultured rumen bacterium	0.00117634
Bacteria	Firmicutes	Clostridia	Clostridiales	Clostridiales vadinBB60 group	metagenome	0.00112733
Bacteria	Proteobacteria	Gammaproteobacteria	Aeromonadales	Succinivibrionaceae	Succinatimonas	0.0010293
Bacteria	Tenericutes	Mollicutes	Izimaplasmatales	uncultured rumen bacterium	uncultured rumen bacterium	0.000931272
Bacteria	Cyanobacteria	Melainabacteria	Gastranaerophilales	gut metagenome	gut metagenome	0.000882257
Bacteria	Patescibacteria	WS6 (Dojkabacteria)	uncultured bacterium	uncultured bacterium	uncultured bacterium	0.000833243
Bacteria	Bacteroidetes	Bacteroidia	Bacteroidales	Dysgonomonadaceae	uncultured	0.000784229
Bacteria	Proteobacteria	Alphaproteobacteria	Sphingomonadales	Sphingomonadaceae	Novosphingobium	0.000784229
Bacteria	Actinobacteria	Actinobacteria	Micrococcales	Sanguibacteraceae	Sanguibacter	0.000784229
Bacteria	Verrucomicrobia	Verrucomicrobiae	Opitutales	Puniceicoccaceae	Verruc-01	0.000735214
Bacteria	Actinobacteria	Actinobacteria	Micrococcales	Microbacteriaceae	Rathayibacter	0.000735214
Bacteria	Proteobacteria	Gammaproteobacteria	Xanthomonadales	Xanthomonadaceae	Stenotrophomonas	0.0006862
Bacteria	Actinobacteria	Actinobacteria	Propionibacteriales	Nocardioidaceae	Aeromicrobium	0.0006862
Bacteria	Actinobacteria	Actinobacteria	Actinomycetales	Actinomycetaceae	Arcanobacterium	0.0006862
Bacteria	Tenericutes	Mollicutes	Izimaplasmatales	unidentified rumen bacterium RFN82	unidentified rumen bacterium RFN82	0.0006862
Bacteria	Proteobacteria	Alphaproteobacteria	Rhodobacterales	Rhodobacteraceae	Planktomarina	0.000637186
Bacteria	Actinobacteria	Actinobacteria	Corynebacteriales	Nocardiaceae	Williamsia	0.000637186
Bacteria	Patescibacteria	Saccharimonadia	Saccharimonadales	Saccharimonadaceae	uncultured bacterium	0.000588172
Bacteria	Proteobacteria	Gammaproteobacteria	Betaproteobacteriales	Burkholderiaceae	Comamonas	0.000588172
Bacteria	Firmicutes	Erysipelotrichia	Erysipelotrichales	Erysipelotrichaceae	Asteroleplasma	0.000588172
Bacteria	Actinobacteria	Coriobacteriia	Coriobacteriales	Coriobacteriaceae	Collinsella	0.000539157
Bacteria	Patescibacteria	Saccharimonadia	Saccharimonadales	Candidatus Saccharibacteria bacterium GW2011_GWC2_44_17	Candidatus Saccharibacteria bacterium GW2011_GWC2_44_17	0.000490143
Bacteria	Actinobacteria	Coriobacteriia	Coriobacteriales	Eggerthellaceae	Denitrobacterium	0.000294086
Bacteria	Actinobacteria	Actinobacteria	Micrococcales	Micrococcaceae	Enteractinococcus	0.000294086
Bacteria	Actinobacteria	Actinobacteria	Micrococcales	Dermabacteraceae	Brachybacterium	0.000294086
Bacteria	Tenericutes	Mollicutes	Mollicutes RF39	uncultured rumen bacterium	uncultured rumen bacterium	0.000294086
Bacteria	Bacteroidetes	Bacteroidia	Bacteroidales	Porphyromonadaceae	Porphyromonas	0.000245071
Bacteria	Firmicutes	Bacilli	Bacillales	Bacillaceae	Oceanobacillus	0.000147043
Bacteria	Firmicutes	Bacilli	Bacillales	Bacillaceae	Gracilibacillus	9.80286e-05
Bacteria	Actinobacteria	Actinobacteria	Bifidobacteriales	Bifidobacteriaceae	Aeriscardovia	0
Bacteria	Actinobacteria	Actinobacteria	Micrococcales	Bogoriellaceae	Georgenia	0
